# Supplementary material
Source: PubMed Central journal article supplement (PMC4643659)
Supplement: NIHMS692023-supplement-Acknowledgment_permission_form.pdf [file NIHMS692023-supplement-Acknowledgment_permission_form.pdf]

### Acknowledgment Permission Form

Journal Stroke  
Manuscript No. STROKE/2015/008939R1  
First author Gulnaz Begum  
Title of work Inhibition of WNK3-SPAK/OS

#### Acknowledgment Permission:

Authors must provide written permission/approval from all individuals mentioned by name in the Acknowledgements section of a submitted manuscript. By signing this form, any and all acknowledged persons therefore state that they have read and approved the mention of their names in the Acknowledgment section of the aforementioned paper.

Printed Name Mohammad Iqbal H. Bhuiyan

Signature 

Date 5/8/15

Printed Name Qing Ye

Signature 

Date 5/8/15

Printed Name

Signature

Date

Printed Name

Signature

Date
